# Supplementary material for: Unique Transcriptional Signatures Correlate with Behavioral and Psychological Symptom Domains in Alzheimer’s Disease
Source: Research Square preprint supplement (doi:10.21203/rs.3.rs-2444391/v1), 2023-01-11
Supplement: Supplementary file 1 [file 20ed0812fb4e66d19e01e923.xlsx]

## Sheet: Sheet1
Label	Domain	Question
halluci10	Psychosis	Has (s)he acted as if (s)he heard things which were not there (e.g., talked, muttered, or mumbled to him/herself as if hearing something, or suddenly glanced around as if startled by hearing something)? How often has this happened in the past month? 0 = No 0.5 = Yes (several per mo [1-3 per mo] OR weekly [4-7 per mo]) 1 = Yes (several per wk [8-20 per mo] OR daily [21+ per mo])
halluci8	Psychosis	Has (s)he said that (s)he has spoken to or seen a person who clearly not there? How often has this happened in the past month? 0 = No 0.5 = Yes (several per mo [1-3 per mo] OR weekly [4-7 per mo]) 1 = Yes (several per wk [8-20 per mo] OR daily [21+ per mo])
halluci12	Psychosis	Has (s)he said that (s)he has heard sounds or voices that no one else could hear? How often has this happened in the past month? 0 = No 0.5 = Yes (several per mo [1-3 per mo] OR weekly [4-7 per mo]) 1 = Yes (several per wk [8-20 per mo] OR daily [21+ per mo])
halluci6	Psychosis	Has (s)he acted as if (s)he saw things which were not there (e.g., appeared to be watching something, staring at something, or startled by something that you could not see)? How often has this happened in the past month? 0 = No 0.5 = Yes (several per mo [1-3 per mo] OR weekly [4-7 per mo]) 1 = Yes (several per wk [8-20 per mo] OR daily [21+ per mo])
halluci2	Psychosis	Has (s)he misperceived things (e.g., tried to pick up something that was not there, thought a loud sound was a gunshot, thought a nail was a bug)? How often has this happened in the past month? 0 = No 0.5 = Yes (several per mo [1-3 per mo] OR weekly [4-7 per mo]) 1 = Yes (several per wk [8-20 per mo] OR daily [21+ per mo])
halluci4	Psychosis	Has (s)he said that his/her reflection in a mirror or window was another person? How often has this happened in the past month? 0 = No 0.5 = Yes (several per mo [1-3 per mo] OR weekly [4-7 per mo]) 1 = Yes (several per wk [8-20 per mo] OR daily [21+ per mo])
fidget4		Has (s)he been pacing or walking around for long periods? How often has this happened in the past month? 0 = No 0.5 = Yes (several per mo [1-3 per mo] OR weekly [4-7 per mo]) 1 = Yes (several per wk [8-20 per mo] OR daily [21+ per mo])
fidget8		Has (s)he been having trouble sitting still for more than a few minutes (other than when eating)? How often has this happened in the past month? 0 = No 0.5 = Yes (several per mo [1-3 per mo] OR weekly [4-7 per mo]) 1 = Yes (several per wk [8-20 per mo] OR daily [21+ per mo])
fidget2		Has (s)he been fidgeting (changing position in the chair, playing with things in sight, fingering clothing)? How often has this happened in the past month? 0 = No 0.5 = Yes (several per mo [1-3 per mo] OR weekly [4-7 per mo]) 1 = Yes (several per wk [8-20 per mo] OR daily [21+ per mo])
delusi4		Has (s)he said that anyone has been plotting against him/her? How often has this happened in the past month? 0 = No 0.5 = Yes (several per mo [1-3 per mo] OR weekly [4-7 per mo]) 1 = Yes (several per wk [8-20 per mo] OR daily [21+ per mo])
temper9	HIDA	Has (s)he done anything that may have scared or hurt another person? 0 = No 1 = Yes
temper13	HIDA	Has (s)he struck or kicked anyone? How often has this happened in the past month? 0 = No 0.5 = Yes (several per mo [1-3 per mo] OR weekly [4-7 per mo]) 1 = Yes (several per wk [8-20 per mo] OR daily [21+ per mo])
temper11	HIDA	Has (s)he pushed or shoved someone? How often has this happened in the past month? 0 = No 0.5 = Yes (several per mo [1-3 per mo] OR weekly [4-7 per mo]) 1 = Yes (several per wk [8-20 per mo] OR daily [21+ per mo])
temper4	HIDA	Has (s)he made threats to harm you or others? How often has this happened in the past month? 0 = No 0.5 = Yes (several per mo [1-3 per mo] OR weekly [4-7 per mo]) 1 = Yes (several per wk [8-20 per mo] OR daily [21+ per mo])
temper2	HIDA	Does (s)he easily lose his/her temper? How often has this happened in the past month? 0 = No 0.5 = Yes (several per mo [1-3 per mo] OR weekly [4-7 per mo]) 1 = Yes (several per wk [8-20 per mo] OR daily [21+ per mo])
temper6	HIDA	Has (s)he shouted or sworn at someone? How often has this happened in the past month? 0 = No 0.5 = Yes (several per mo [1-3 per mo] OR weekly [4-7 per mo]) 1 = Yes (several per wk [8-20 per mo] OR daily [21+ per mo])
temper8	HIDA	Has (s)he thrown or destroyed an object? How often has this happened in the past month? 0 = No 0.5 = Yes (several per mo [1-3 per mo] OR weekly [4-7 per mo]) 1 = Yes (several per wk [8-20 per mo] OR daily [21+ per mo])
depress	Affective	At any time during the past month, has (s)he seemed sad or down for more than a day or so? 0 = No 1 = Yes
mood	Affective	How frequent have mood symptoms been in the past month? 0 = None 0.5 = Several per mo [1-3 per mo] OR weekly [4-7 per mo] 1 = Several per wk [8-20 per mo] OR daily [21+ per mo]
sadlong	Affective	How long did (s)he seem sad or down? 0 = Less than 1 week 0.5 = More than 1 week, but less than 2 1 = 2 weeks or more
upsetdur	Affective	How much of the time does (s)he seem anxious or upset? 0 = Occasionally (not more than several hours during the course of the week) 0.5 = Frequently (one or more episodes per day are common) 1 = Pervasively (most of the time (s)he seems anxious or upset)
critical	Affective	During the past month, has Mrs./Ms./Mr. seemed especially critical of her/himself? 0 = No 1 = Yes
talkphys	Affective	During the past month, did (s)he frequently complain about her/his physical health apart from memory difficulties? 0 = No 1 = Yes
notworth	Affective	Has (s)he made any comments during the past month that life is not worth living or (s)he would be better off dead? 0 = No 1 = Yes
upset	Affective	Did (s)he seem to be anxious or easily upset during the past month? 0 = No 1 = Yes
delusi2		Has (s)he said that anyone has cheated or stolen from him/her? How often has this happened in the past month? 0 = No 0.5 = Yes (several per mo [1-3 per mo] OR weekly [4-7 per mo]) 1 = Yes (several per wk [8-20 per mo] OR daily [21+ per mo])
physanx	Affective	In the past month, has (s)he had any physical symptoms that sometimes go along with being nervous, like: shortness of breath; rapid heartbeat or chest pains; upset stomach or diarrhea; headaches, stiff neck, or trembling hands; or intense sweating? 0 = No 0.5 = Yes, 1-2 symptoms 1 = Yes, ≥ 3 symptoms
delusi8		Has (s)he said that that others are too harsh or critical of him/her? How often has this happened in the past month? 0 = No 0.5 = Yes (several per mo [1-3 per mo] OR weekly [4-7 per mo]) 1 = Yes (several per wk [8-20 per mo] OR daily [21+ per mo])
delusi6		Has (s)he said that others are spying on him/her? How often has this happened in the past month? 0 = No 0.5 = Yes (several per mo [1-3 per mo] OR weekly [4-7 per mo]) 1 = Yes (several per wk [8-20 per mo] OR daily [21+ per mo])
apathy5	Apathy	Has (s)he lost interest in things that (s)he used to enjoy, such as hobbies or recreational activities? 0 = No 1 = Yes
apathy6	Apathy	Will (s)he still do these things if encouraged to do so? 0 = Yes 1 = No
apathy10.11	Apathy	In the past month, has (s)he had trouble getting going or getting started at something? Are you (or others) able to get her/him going with prompting or encouragement? 0 = No trouble 0.5 = Trouble, able to prompt 1 = Trouble, not able to prompt
apathy7	Apathy	Has (s)he also lost interest in being with other people or taking care of her/his appearance? 0 = No 1 = Yes
apathy12	Apathy	In the past month, has (s)he seemed less responsive emotionally in any way? 0 = No 1 = Yes
apathy1	Apathy	Has (s)he been just sitting for long periods during the past month? 0 = No 1 = Yes
